# Supplementary material
Source: HighWire-hosted journal article supplement (https://www.cmajopen.ca/highwire/filestream/87783/field_highwire_adjunct_files/3/open-2021-0065-4-at.pdf)
Supplement: open-2021-0065-4-at.pdf [file open-2021-0065-4-at.pdf]

Appendix 4, as supplied by the authors. Appendix to: Chan-Nguyen S, O’Riordan A, Morin A, et al. Patient and caregiver perspectives on virtual care: a patient-oriented qualitative study. *CMAJ Open* 2022. doi: 10.9778/cmajo.20210065. Copyright © 2022 The Author(s) or their employer(s). To receive this resource in an accessible format, please contact us at [cmajgroup@cmaj.ca](mailto:cmajgroup@cmaj.ca).

# Virtual Care Discussion Group Exit Survey

Thank you very much for participating in our Virtual Care Discussion Groups!

Your responses will help us improve the discussion groups moving forward. You may finish the survey in one sitting or you may save it and finish it at a later date. The survey should take between 15-20 minutes to complete.

This survey is hosted on REDCap, a secure web application. All responses will be encrypted and only the study team members can read it. All your responses are confidential and we value any information you can give us.

As noted in the Letter of Information, you do not have to answer any or all of the questions if you do not wish to. Please select the option "Prefer not to answer" in this case.

Please note that there will be a series of questions related the honorarium near the end of the survey. If you would like to receive the honorarium, please be sure to fill out that section.

If you should have any questions or concerns about this study, please do not hesitate to contact Sophy Chan (swsc@queensu.ca).

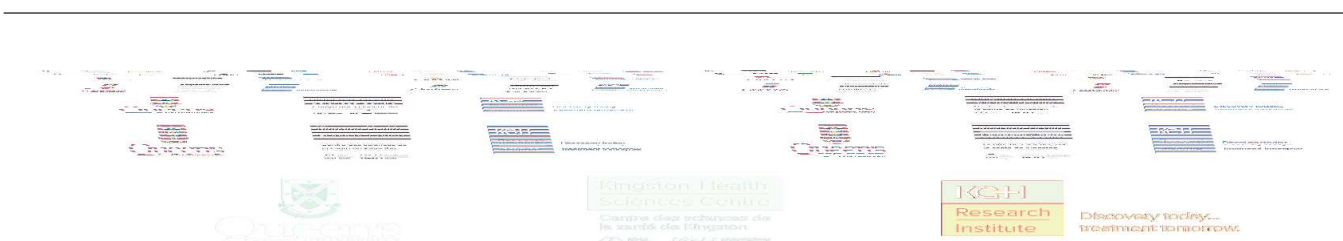

## Section 1: Demographic Questions

What year were you born? (Please type 'PNA' if you prefer not to answer this question)

---

What is your sex?

- ☐ Male
- ☐ Female
- ☐ Other
- ☐ Prefer not to answer

If other, please indicate a response if you are comfortable:

---

---

Are you a member of any of the following groups? (Check all that apply)

- ☐ Visible minority
- ☐ Persons with disabilities
- ☐ Indigenous people of Canada
- ☐ Recent immigrant to Canada
- ☐ LGBTQ community
- ☐ Do not know
- ☐ Prefer not to answer

---

If you identify as belonging to another identify group, please indicate a response if you are comfortable:

---

---

What is the highest level of education that you have completed?

Note: Some people may have completed multiple types of education. If this applies to you, please select the highest level of education that you have achieved.

- ☐ No schooling
- ☐ Some or completed elementary school
- ☐ Some high school
- ☐ Completed high school
- ☐ Some post-secondary (college, university, technical training) education
- ☐ Completed college
- ☐ Completed technical training (e.g., apprenticeship)
- ☐ Completed university
- ☐ Completed post graduate, professional, or graduate degree
- ☐ Do not know
- ☐ Prefer not to answer

---

What is your current work status?

- ☐ Working for pay part time (including retired part time, homemaker part time)
- ☐ Working for pay on a casual or on-call basis
- ☐ Not in labour force, able to work
- ☐ Not in labour force, unable to work
- ☐ Retired
- ☐ Student (includes students working part time)
- ☐ Homemaker
- ☐ Do not know
- ☐ Prefer not to answer

---

Have you ever worked for pay in a healthcare profession?

Note: We are interested in paid experience in health care due to the health focus of this work.

- ☐ Yes,
- ☐ No
- ☐ I don't know / I'm not sure
- ☐ Do not know
- ☐ Prefer not to answer

---

What perspective did you bring to the Virtual Care Access Discussion Group project?

- ☐ Patient/patient advisor/patient partner
- ☐ Family member/caregiver
- ☐ Community member
- ☐ Community partner
- ☐ Other
- ☐ Do not know
- ☐ Prefer not to answer

---

If other, please specify:

\_\_\_\_\_

**Section 2: Communication and Supports for Participation:****Please indicate your level of agreement with each of the statements below:**

|                                                                                      | Strongly disagree     | Disagree              | Neither agree nor disagree | Agree                 | Strongly agree        | Do not know           | Prefer not to answer  |
|--------------------------------------------------------------------------------------|-----------------------|-----------------------|----------------------------|-----------------------|-----------------------|-----------------------|-----------------------|
| I had a clear understanding of the purpose of the discussion group.                  | <input type="radio"/> | <input type="radio"/> | <input type="radio"/>      | <input type="radio"/> | <input type="radio"/> | <input type="radio"/> | <input type="radio"/> |
| The supports I needed to participate were available (e.g., travel, childcare, etc.). | <input type="radio"/> | <input type="radio"/> | <input type="radio"/>      | <input type="radio"/> | <input type="radio"/> | <input type="radio"/> | <input type="radio"/> |
| I had enough information to contribute to the topic being discussed.                 | <input type="radio"/> | <input type="radio"/> | <input type="radio"/>      | <input type="radio"/> | <input type="radio"/> | <input type="radio"/> | <input type="radio"/> |

---

What else would you like us to know about how your participation in the Virtual Care Access Discussion Group Project was supported?

### Section 3: Sharing Your Views and Perspectives

|                                                                                                               | Strongly disagree     | Disagree              | Neither agree nor disagree | Agree                 | Strongly agree        | Do not know           | Prefer not to answer  |
|---------------------------------------------------------------------------------------------------------------|-----------------------|-----------------------|----------------------------|-----------------------|-----------------------|-----------------------|-----------------------|
| I was able to express my views freely.                                                                        | <input type="radio"/> | <input type="radio"/> | <input type="radio"/>      | <input type="radio"/> | <input type="radio"/> | <input type="radio"/> | <input type="radio"/> |
| I feel that my views were heard.                                                                              | <input type="radio"/> | <input type="radio"/> | <input type="radio"/>      | <input type="radio"/> | <input type="radio"/> | <input type="radio"/> | <input type="radio"/> |
| A wide range of views on the topics discussed was shared.                                                     | <input type="radio"/> | <input type="radio"/> | <input type="radio"/>      | <input type="radio"/> | <input type="radio"/> | <input type="radio"/> | <input type="radio"/> |
| The individuals participating in the discussion group represented a broad range of perspectives on the topic. | <input type="radio"/> | <input type="radio"/> | <input type="radio"/>      | <input type="radio"/> | <input type="radio"/> | <input type="radio"/> | <input type="radio"/> |

---

What else would you like us to know about how you were able to share your views?

#### Section 4: Impacts and Influence of the Engagement Initiative

|                                                                                                          | Strongly disagree     | Disagree              | Neither agree nor disagree | Agree                 | Strongly agree        | Do not know           | Prefer not to answer  |
|----------------------------------------------------------------------------------------------------------|-----------------------|-----------------------|----------------------------|-----------------------|-----------------------|-----------------------|-----------------------|
| I think that the discussion group achieved its objectives.                                               | <input type="radio"/> | <input type="radio"/> | <input type="radio"/>      | <input type="radio"/> | <input type="radio"/> | <input type="radio"/> | <input type="radio"/> |
| I am confident the input provided through this initiative will be used by the study team.                | <input type="radio"/> | <input type="radio"/> | <input type="radio"/>      | <input type="radio"/> | <input type="radio"/> | <input type="radio"/> | <input type="radio"/> |
| I think the input provided through this activity will make a difference to the work of the organization. | <input type="radio"/> | <input type="radio"/> | <input type="radio"/>      | <input type="radio"/> | <input type="radio"/> | <input type="radio"/> | <input type="radio"/> |

---

What else would you like us to know about the influence you think the Virtual Care Access Discussion Groups Project will have?

**Section 5: Final Thoughts**

|                                                                                                   | Strongly disagree     | Disagree              | Neither agree nor disagree | Agree                 | Strongly agree        | Do not know           | Prefer not to answer  |
|---------------------------------------------------------------------------------------------------|-----------------------|-----------------------|----------------------------|-----------------------|-----------------------|-----------------------|-----------------------|
| As a result of my participation in the discussion group, I am better informed about virtual care. | <input type="radio"/> | <input type="radio"/> | <input type="radio"/>      | <input type="radio"/> | <input type="radio"/> | <input type="radio"/> | <input type="radio"/> |
| Overall, I was satisfied with this engagement initiative.                                         | <input type="radio"/> | <input type="radio"/> | <input type="radio"/>      | <input type="radio"/> | <input type="radio"/> | <input type="radio"/> | <input type="radio"/> |
| This engagement initiative was a good use of my time.                                             | <input type="radio"/> | <input type="radio"/> | <input type="radio"/>      | <input type="radio"/> | <input type="radio"/> | <input type="radio"/> | <input type="radio"/> |

---

What were the strengths of the discussion group?

---

What could be improved about your discussion group?

---

What else would you like us to know about your experience with the Virtual Care Discussion Group project?



---

There is a secondary portion of this study. We are looking for individuals to help review some of the themes, ideas, and thoughts shared during their discussion group session. This is a voluntary activity but it will help to ensure that the research team is accurately capturing what was shared in the discussion groups.

Interested participants will receive a document summarizing the points explored in their discussion group session and will be asked to revise the themes in another online meeting with the research team or through email.

Would you like to participate in revising the results of your discussion group session?

- ☐ Yes  
☐ No

---

Thank you very much for participating in our study!
